# Supplementary material
Source: publisher figshare collection journal article supplement (https://tandf.figshare.com/articles/dataset/_/12137217)
Supplement: Supplementary file 1 [file 1]

Archive with 2 entries (2 files):
- lbps_a_1744620_sm7617.tex
- lbps_a_1744620_sm7616.pdf
