# Supplementary material
Source: publisher figshare collection journal article supplement (https://tandf.figshare.com/articles/dataset/_/12137217)
Supplement: Supplementary file 1 [file 1 › lbps_a_1744620_sm7616.pdf]

# Supplemental Materials to “Modified Goldilocks Design with Strict Type I Error Control in Confirmatory Clinical Trials”

February 14, 2020

## 1 Generalization to Multiple Interim Checkpoints

In the main article, we incorporate one ISC to the study and it corresponds to a two-stage design. Here we generalize it to multiple ISCs.

Suppose we have  $L$  checkpoints to select a trial’s sample size based on predictive probabilities, then each interim look  $l$  is performed when  $n_{j,l}$  subjects have been recruited to group  $j$ . Note that  $n_{j,1} < n_{j,2} < \dots < n_{j,L} < n_j^{(m)}$ , where  $n_j^{(m)}$  is the maximum sample size for group  $j$  defined earlier. Correspondingly, there will be  $n_{j,l}^{(o)}$  subjects that have developed their responses while  $n_{j,l}^{(u)}$  have not. Graphical illustrations of population notions in MGD with two ISCs are provided at Figure 1. At interim look  $l$ , predictive probabilities  $\text{MPP}_{n,l}$  and  $\text{MPP}_{max,l}$  are calculated from all currently available data. We ignore the subscripts  $l$  for simplicity in the remainder of this section.

For final efficacy analysis, stagewise  $p$ -values in MGD are calculated from separate cohorts of subjects as illustrated in the single ISC case in the main article. As a generalization to multiple looks, at checkpoint  $l$ , if we observe  $\text{MPP}_{max} \geq F_n$  and  $\text{MPP}_n > S_n$ , which means

that we will stop recruiting subjects, then  $p_{l+1}$  is calculated from data  $[n_{c,l}^{(u)}, n_{t,l}^{(u)}]$ . On the other hand, if we observe  $\text{MPP}_{max} \geq F_n$  and  $\text{MPP}_n \leq S_n$ , we will continue recruiting subjects to the next checkpoint  $l + 1$  (when  $n_{j,l+1}$  subjects are recruited). The  $p$ -value  $p_{l+1}$  is instead calculated using data  $[n_{c,l+1}^{(o)} - n_{c,l}^{(o)}, n_{t,l+1}^{(o)} - n_{t,l}^{(o)}]$ . If  $l + 1$  is the end of study enrollment, then  $p_{l+1}$  is calculated from  $[n_c^{(m)} - n_{c,l}^{(o)}, n_t^{(m)} - n_{t,l}^{(o)}]$ . A rule of thumb is that a cohort of subjects would not contribute to both the predictive probability at one stage and the  $p$ -value calculation in the following stage.

Figure 1: Population Notations for MGD with Multiple Checkpoints

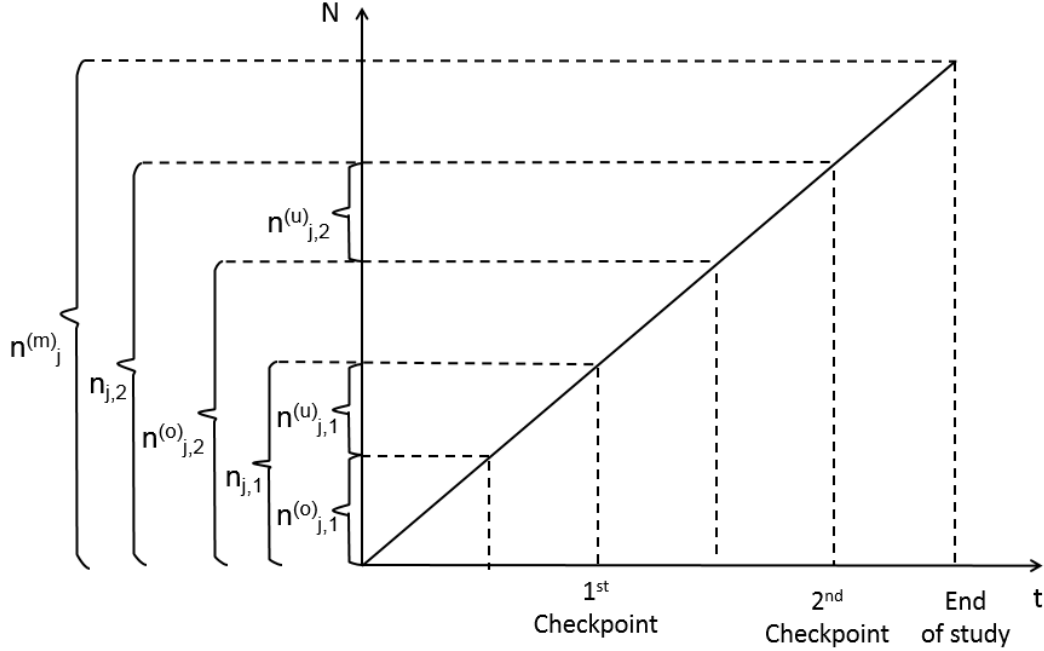

Having obtained all available stagewise  $p$ -values, we could further combine them to test the null hypothesis. Assume a study has  $L'$  ( $L' \leq L$ ) checkpoints before stopping enrollment and hence  $L' + 1$  stagewise  $p$ -values. If a study enrolls subjects to the maximum sample size  $n_j^m$ , then  $L = L'$ . A backward recursion algorithm [Brannath et al., 2002] can be applied if there are more than one ISC. A  $p$ -value for the combination test is defined by

$$q(p_1, p_2) = \begin{cases} p_1 & \text{if } p_1 \leq \alpha_1 \text{ or } p_1 \geq \alpha_0 \\ \alpha_1 + \int_{\alpha_1}^{\alpha_0} \int_0^1 I[C(x, y) \leq c(\alpha_1, \alpha_0, \alpha)] dy dx & \text{otherwise.} \end{cases}$$

In MGD, one would set  $\alpha_1 = 0$  and obtain  $\alpha_0$  as described in the previous section. The recursive combination tests operate as following. First calculate combined  $p$ -values  $q_{L'}(p_{L'}, p_{L'+1})$  for the last two stages, where  $p_{L'}$  and  $p_{L'+1}$  are  $p$ -values from the  $L'$ th and  $(L' + 1)$ th stages, respectively. Then one could insert  $q_{L'}(p_{L'}, p_{L'+1})$  to  $q_{L'-1}[p_{L'-1}, q_{L'}(p_{L'}, p_{L'+1})]$  for the calculation of combined  $p$ -value in a previous stage, and repeat these steps up to the first stage. The null hypothesis is rejected if  $q_1[p_1, q_2(\cdot)] < \alpha$ , where  $\alpha$  is the pre-specified type I error rate. If the so-called “p-clud” condition is satisfied for all stage-wise  $p$ -values, then the backward recursion algorithm could preserve overall type I error at  $\alpha$  [Liu et al., 2002].

## 2 Additional simulation results

### 2.1 Binary endpoint with modified predictive probabilities

We provided additional simulations results of using modified predictive probabilities in MGD with binary endpoint in Table 1 and 2 to evaluate type I error control and power performance.

### 2.2 Binary endpoint in a three-stage design

In this section, we provide a small simulation study for binary endpoint in a three-stage design with two ISCs. We consider a design with no futility stopping ( $F_n = 0$ ) and three varying  $S_n$ ’s at 0.8, 0.85 and 0.9. The number of subjects per group with observed response is  $n_1^{(o)} = 100$  by the first ISC, and  $n_2^{(o)} = 200$  by the second ISC. The number of subjects with unobserved response is  $n_1^{(u)} = n_2^{(u)} = 40$ . The maximum sample size per group is  $n^{(m)} = 300$ . The number of simulation iteration is  $10^5$ , and we use  $10^3$  samples to evaluated  $P_n$  and  $P_{max}$  by Monte Carlo integration. Equal weights are utilized in the Inverse Normal combination function.

As shown in Table 3, our MGD accurately controls the type I error at the nominal level  $\alpha = 0.025$  at the null scenarios when the treatment effect  $\Delta = 0$ . The critical value  $c_g(\alpha)$  is

Table 1: Type I error rate with modified  $P_n^F$ ,  $P_{max}^F$ ,  $P_n^I$ , and  $P_{max}^I$

| Scenario | $\theta_0$ | Sn  | Fn  | $n^{(o)}$ | $n^{(u)}$ | $MGD^F$ | $MGD^I$ | GD    |
|----------|------------|-----|-----|-----------|-----------|---------|---------|-------|
| S1       | 0.6        | 0.8 | 0.1 | 80        | 15        | 0.025   | 0.025   | 0.028 |
|          |            |     |     |           | 20        | 0.025   | 0.025   | 0.027 |
|          |            |     |     |           | 40        | 0.025   | 0.025   | 0.025 |
|          |            |     |     |           | 60        | 0.025   | 0.025   | 0.024 |
|          |            |     |     |           | 80        | 0.025   | 0.025   | 0.023 |
|          |            |     |     |           | 100       | 0.025   | 0.025   | 0.022 |
| S2       | 0.4        | 0.9 | 0   | 80        | 15        | 0.025   | 0.025   | 0.028 |
|          |            |     |     |           | 20        | 0.025   | 0.025   | 0.027 |
|          |            |     |     |           | 40        | 0.025   | 0.025   | 0.025 |
|          |            |     |     |           | 60        | 0.025   | 0.025   | 0.024 |
|          |            |     |     |           | 80        | 0.025   | 0.025   | 0.024 |
|          |            |     |     |           | 100       | 0.025   | 0.025   | 0.024 |
| S3       | 0.1        | 0.8 | 0.1 | 80        | 20        | 0.024   | 0.025   | 0.026 |
|          | 0.3        |     |     |           |           | 0.025   | 0.025   | 0.027 |
|          | 0.4        |     |     |           |           | 0.025   | 0.025   | 0.027 |
|          | 0.6        |     |     |           |           | 0.025   | 0.025   | 0.027 |
|          | 0.8        |     |     |           |           | 0.025   | 0.025   | 0.027 |
|          | 0.9        |     |     |           |           | 0.024   | 0.025   | 0.026 |
| S4       | 0.6        | 0.8 | 0   | 20        | 20        | 0.025   | 0.026   | 0.028 |
|          |            |     |     | 40        |           | 0.025   | 0.025   | 0.029 |
|          |            |     |     | 60        |           | 0.025   | 0.025   | 0.029 |
|          |            |     |     | 80        |           | 0.025   | 0.025   | 0.029 |
|          |            |     |     | 100       |           | 0.025   | 0.024   | 0.028 |
|          |            |     |     | 120       |           | 0.025   | 0.025   | 0.028 |

adjusted to be 0.018 for GD to control the error rate at 0.025. In power evaluation, GD is slightly more powerful than MGD when  $S_n = 80\%$ , but becomes similar for  $S_n = 90\%$ .

### 2.3 Operating characteristics of $MGD^F$ in time-to-event endpoint

The operating characteristics of  $MGD^F$  in the time-to-event case study at Section 5 are at Table 4.

## References

- [Brannath et al., 2002] Brannath, W., Posch, M., and Bauer, P. (2002). Recursive combination tests. *Journal of the American Statistical Association*, 97(457):236–244.
- [Liu et al., 2002] Liu, Q., Proschan, M. A., and Pledger, G. W. (2002). A unified theory of two-stage adaptive designs. *Journal of the American Statistical Association*, 97(460):1034–1041.

Table 2: Power with modified  $P_n^F$ ,  $P_{max}^F$ ,  $P_n^I$ , and  $P_{max}^I$ 

| Scenario | $\theta_c$ | $\Delta$ | Sn  | Fn  | $n^{(o)}$ | $n^{(u)}$ | $MGD^F$ | $MGD^I$ | GD    |
|----------|------------|----------|-----|-----|-----------|-----------|---------|---------|-------|
| S1       | 0.1        | 0        | 0.8 | 0.1 | 80        | 15        | 0.024   | 0.025   | 0.027 |
|          | 0.3        |          |     |     |           |           | 0.025   | 0.025   | 0.028 |
|          | 0.5        |          |     |     |           |           | 0.025   | 0.025   | 0.027 |
|          | 0.7        |          |     |     |           |           | 0.025   | 0.025   | 0.028 |
|          | 0.9        |          |     |     |           |           | 0.024   | 0.025   | 0.027 |
| S1       | 0.3        | 0.143    | 0.8 | 0.1 | 80        | 15        | 0.811   | 0.788   | 0.804 |
|          |            | 0.17     |     |     |           |           | 0.919   | 0.885   | 0.910 |
|          |            | 0.188    |     |     |           |           | 0.958   | 0.922   | 0.950 |
|          | 0.7        | 0.127    |     |     |           |           | 0.819   | 0.810   | 0.811 |
|          |            | 0.145    |     |     |           |           | 0.913   | 0.895   | 0.903 |
|          |            | 0.16     |     |     |           |           | 0.959   | 0.937   | 0.949 |
| S2       | 0.1        | 0        | 0.8 | 0.1 | 80        | 40        | 0.024   | 0.025   | 0.024 |
|          | 0.3        |          |     |     |           |           | 0.025   | 0.025   | 0.025 |
|          | 0.5        |          |     |     |           |           | 0.025   | 0.025   | 0.023 |
|          | 0.7        |          |     |     |           |           | 0.025   | 0.025   | 0.025 |
|          | 0.9        |          |     |     |           |           | 0.024   | 0.025   | 0.024 |
| S2       | 0.4        | 0.15     | 0.8 | 0.1 | 80        | 40        | 0.822   | 0.810   | 0.807 |
|          |            | 0.175    |     |     |           |           | 0.919   | 0.905   | 0.907 |
|          |            | 0.195    |     |     |           |           | 0.962   | 0.949   | 0.953 |
|          | 0.6        | 0.14     |     |     |           |           | 0.813   | 0.801   | 0.805 |
|          |            | 0.16     |     |     |           |           | 0.907   | 0.892   | 0.898 |
|          |            | 0.18     |     |     |           |           | 0.960   | 0.947   | 0.953 |
| S3       | 0.1        | 0        | 0.8 | 0.1 | 80        | 80        | 0.024   | 0.025   | 0.022 |
|          | 0.3        |          |     |     |           |           | 0.025   | 0.025   | 0.022 |
|          | 0.5        |          |     |     |           |           | 0.025   | 0.025   | 0.021 |
|          | 0.7        |          |     |     |           |           | 0.025   | 0.025   | 0.023 |
|          | 0.9        |          |     |     |           |           | 0.025   | 0.025   | 0.022 |
| S3       | 0.4        | 0.149    | 0.8 | 0.1 | 80        | 80        | 0.819   | 0.814   | 0.806 |
|          |            | 0.172    |     |     |           |           | 0.912   | 0.907   | 0.902 |
|          |            | 0.192    |     |     |           |           | 0.958   | 0.954   | 0.952 |
|          | 0.6        | 0.137    |     |     |           |           | 0.797   | 0.797   | 0.792 |
|          |            | 0.159    |     |     |           |           | 0.905   | 0.903   | 0.902 |
|          |            | 0.178    |     |     |           |           | 0.958   | 0.956   | 0.956 |

Table 3: Type I error and Power in a three-stage design

| Scenario | $\theta_c$ | $\Delta$ | $S_n$ | $MGD^F$ | $MGD^I$ | GD    |
|----------|------------|----------|-------|---------|---------|-------|
| S1       | 0.2        | 0        | 0.8   | 0.025   | 0.025   | 0.025 |
|          | 0.4        |          |       | 0.025   | 0.025   | 0.024 |
|          | 0.6        |          |       | 0.024   | 0.025   | 0.024 |
|          | 0.8        |          |       | 0.025   | 0.025   | 0.025 |
|          | 0.6        | 0.1      |       | 0.640   | 0.653   | 0.667 |
|          |            | 0.15     |       | 0.933   | 0.921   | 0.941 |
| S2       | 0.2        | 0        | 0.85  | 0.025   | 0.025   | 0.024 |
|          | 0.4        |          |       | 0.025   | 0.026   | 0.024 |
|          | 0.6        |          |       | 0.025   | 0.025   | 0.024 |
|          | 0.8        |          |       | 0.025   | 0.025   | 0.024 |
|          | 0.6        | 0.1      |       | 0.649   | 0.664   | 0.672 |
|          |            | 0.15     |       | 0.943   | 0.928   | 0.946 |
| S3       | 0.2        | 0        | 0.9   | 0.025   | 0.026   | 0.023 |
|          | 0.4        |          |       | 0.026   | 0.026   | 0.023 |
|          | 0.6        |          |       | 0.025   | 0.026   | 0.022 |
|          | 0.8        |          |       | 0.025   | 0.025   | 0.022 |
|          | 0.6        | 0.1      |       | 0.665   | 0.678   | 0.678 |
|          |            | 0.15     |       | 0.955   | 0.940   | 0.955 |

Table 4: Operating characteristics of  $\text{MGD}^F$  in time-to-event endpoint

| Enrollment<br>rate<br>(per month) | Control<br>1-year<br>survival | Hazard<br>ratio | Early stopping<br>for futility | Early stopping<br>and predicting<br>success | Type I error /<br>power | ASN |
|-----------------------------------|-------------------------------|-----------------|--------------------------------|---------------------------------------------|-------------------------|-----|
| 10                                | 0.20                          | 1.00            | 0.564                          | 0.006                                       | 0.021                   | 286 |
|                                   | 0.30                          | 1.00            | 0.542                          | 0.006                                       | 0.020                   | 290 |
|                                   | 0.50                          | 1.00            | 0.502                          | 0.007                                       | 0.020                   | 298 |
|                                   | 0.60                          | 1.00            | 0.487                          | 0.008                                       | 0.021                   | 301 |
|                                   | 0.30                          | 0.72            | 0.081                          | 0.141                                       | 0.669                   | 355 |
|                                   | 0.30                          | 0.66            | 0.039                          | 0.235                                       | 0.844                   | 345 |
|                                   | 0.30                          | 0.61            | 0.016                          | 0.355                                       | 0.943                   | 326 |
|                                   |                               |                 |                                |                                             |                         |     |
| 5                                 | 0.20                          | 1.00            | 0.624                          | 0.006                                       | 0.024                   | 274 |
|                                   | 0.30                          | 1.00            | 0.610                          | 0.006                                       | 0.023                   | 277 |
|                                   | 0.50                          | 1.00            | 0.597                          | 0.006                                       | 0.023                   | 279 |
|                                   | 0.60                          | 1.00            | 0.587                          | 0.006                                       | 0.024                   | 281 |
|                                   | 0.30                          | 0.74            | 0.097                          | 0.160                                       | 0.632                   | 348 |
|                                   | 0.30                          | 0.68            | 0.045                          | 0.277                                       | 0.824                   | 336 |
|                                   | 0.30                          | 0.63            | 0.017                          | 0.422                                       | 0.936                   | 312 |
|                                   |                               |                 |                                |                                             |                         |     |
