# Supplementary material
Source: publisher figshare collection journal article supplement (https://tandf.figshare.com/articles/dataset/_/12137217)
Supplement: Supplementary file 1 [file 1 › lbps_a_1744620_sm7617.tex]

\title{Supplemental Materials to ``Modified Goldilocks Design with Strict Type I Error Control in Confirmatory Clinical Trials''}

\date{\today}

\documentclass[12pt]{article}


\usepackage{amsmath}
\usepackage{amsfonts}
\usepackage{amssymb}
\usepackage{yhmath}
\usepackage{boldline}
\usepackage{graphicx}
\usepackage{filecontents}
\usepackage{setspace}

\usepackage{todonotes}
\usepackage{changes}
\definechangesauthor[color=orange]{HZ}
\usepackage[margin=1in]{geometry}

\doublespacing


\newcommand{\widesim}[2][1.5]{
  \mathrel{\overset{#2}{\scalebox{#1}[1]{$\sim$}}}
}


\begin{document}
\maketitle

% \tableofcontents

%\listofchanges

\section{Generalization to Multiple Interim Checkpoints}
\label{s:general}

In the main article, we incorporate one ISC to the study and it corresponds to a two-stage design. Here we generalize it to multiple ISCs. 

Suppose we have $L$ checkpoints to select a trial's sample size based on predictive probabilities, then each interim look $l$ is performed when $n_{j, l}$ subjects have been recruited to group $j$. Note that $n_{j, 1} < n_{j, 2} < ... < n_{j, L}<n^{(m)}_j$, where $n^{(m)}_j$ is the maximum sample size for group $j$ defined earlier. Correspondingly, there will be  $n^{(o)}_{j, l}$ subjects that have developed their responses while  $n^{(u)}_{j, l}$ have not. Graphical illustrations of population notions in MGD with two ISCs are provided at Figure \ref{F:multi stages plot}. At interim look $l$, predictive probabilities $\text{MPP}_{n, l}$ and $\text{MPP}_{max, l}$ are calculated from all currently available data. We ignore the subscripts $l$ for simplicity in the remainder of this section.

For final efficacy analysis, stagewise $p$-values in MGD are calculated from separate cohorts of subjects as illustrated in the single ISC case in the main article. As a generalization to multiple looks, at checkpoint $l$, if we observe $\text{MPP}_{max} \geq F_n$ and $\text{MPP}_n > S_n$, which means that we will stop recruiting subjects, then $p_{l+1}$ is calculated from data $\left[n^{(u)}_{c, l}, n^{(u)}_{t, l}\right]$. On the other hand, if we observe $\text{MPP}_{max} \geq F_n$ and $\text{MPP}_n \leq S_n$, we will continue recruiting subjects to the next checkpoint $l+1$ (when $n_{j, l+1}$ subjects are recruited). The $p$-value $p_{l+1}$ is instead calculated using data $\left[n^{(o)}_{c, l+1} - n^{(o)}_{c, l}, n^{(o)}_{t, l+1} - n^{(o)}_{t, l}\right)$. If $l+1$ is the end of study enrollment, then $p_{l+1}$ is calculated from $\left[n^{(m)}_{c} - n^{(o)}_{c, l}, n^{(m)}_{t} - n^{(o)}_{t, l}\right]$. A rule of thumb is that a cohort of subjects would not contribute to both the predictive probability at one stage and the $p$-value calculation in the following stage. 

\begin{figure}[h]
\caption{Population Notations for MGD with Multiple Checkpoints}
\label{F:multi stages plot}
\centering
\includegraphics[width=14cm]{multi_stages_plot}
\end{figure}

Having obtained all available stagewise $p$-values, we could further combine them to test the null hypothesis. Assume a study has $L^\prime$ ($L^\prime \leq L$) checkpoints before stopping enrollment and hence $L^\prime + 1$ stagewise $p$-values. If a study enrolls subjects to the maximum sample size $n^m_j$, then $L = L^\prime$. A backward recursion algorithm \cite{brannath2002recursive} can be applied if there are more than one ISC. A $p$-value for the combination test is defined by 
  \[
    q(p_1, p_2)=\left\{
                \begin{array}{ll}
                  p_1 \:\:\:\:\:\:\:\:\:\:\:\:\:\:\:\:\:\:\:\:\:\:\:\:\:\:\:\:\:\:\:\:\:\:\:\:\:\:\:\:\:\:\:\:\:\:\:\:\:\:\:\:\:\:\:\:\:\:\:\:\:\:\:\:\:\:\:\:\:\:\:\:\:\:\:\:\:\: \text{if }p_1 \leq \alpha_1 \text{ or } p_1 \geq \alpha_0 \\\
                  \alpha_1 + \int_{\alpha_1}^{\alpha_0} \int_0^1 I[C(x, y) \leq c (\alpha_1, \alpha_0, \alpha) dy dx \:\:\:\:\: \text{otherwise.}
                \end{array}
              \right.
  \]
In MGD, one would set $\alpha_1 = 0$ and obtain $\alpha_0$ as described in the previous section. The recursive combination tests operate as following. First calculate combined $p$-values $q_{L^\prime}(p_{L^\prime}, p_{L^\prime + 1})$ for the last two stages, where $p_{L^\prime}$ and $p_{L^\prime+1}$ are $p$-values from the $L^\prime$th and $(L^\prime+1)$th stages, respectively. Then one could insert  $q_{L^\prime}(p_{L^\prime}, p_{L^\prime+1})$ to $q_{L^\prime-1}[p_{L^\prime-1}, q_{L^\prime}(p_{L^\prime}, p_{L^\prime+1})]$ for the calculation of combined $p$-value in a previous stage, and repeat these steps up to the first stage. The null hypothesis is rejected if $q_1[p_1, q_2(.)] < \alpha$, where $\alpha$ is the pre-specified type I error rate. If the so-called ``p-clud" condition is satisfied for all stage-wise $p$-values, then the backward recursion algorithm could preserve overall type I error at $\alpha$ \cite{liu2002unified}. 

\section{Additional simulation results} 

\subsection{Binary endpoint with modified predictive probabilities}

We provided additional simulations results of using modified predictive probabilities in MGD with binary endpoint in Table \ref{T: error revised pn} and \ref{T: power revised pn} to evaluate type I error control and power performance. 
% table 3 for type 1 error with revised pn
\begin{table}[ht]
\renewcommand*{\arraystretch}{1.1}
\caption{Type I error rate with modified $P^F_n$, $P^F_{max}$, $P^I_n$, and $P^I_{max}$} 
\label{T: error revised pn}
\bigskip
\centering
\begin{tabular}{ccccccccc}
  \hline
Scenario & $\theta_0$ & Sn & Fn & $n^{(o)}$ & $n^{(u)}$ & MGD$^F$ & MGD$^I$ & GD \\
  \hline
S1 & 0.6 & 0.8 & 0.1 & 80 & 15 & 0.025 & 0.025 & 0.028 \\ 
   &  &  &  &  & 20 & 0.025 & 0.025 & 0.027 \\ 
   &  &  &  &  & 40 & 0.025 & 0.025 & 0.025 \\ 
   &  &  &  &  & 60 & 0.025 & 0.025 & 0.024 \\ 
   &  &  &  &  & 80 & 0.025 & 0.025 & 0.023 \\ 
   &  &  &  &  & 100 & 0.025 & 0.025 & 0.022 \\ 
   \hline
  S2 & 0.4 & 0.9 & 0 & 80 & 15 & 0.025 & 0.025 & 0.028 \\ 
   &  &  &  &  & 20 & 0.025 & 0.025 & 0.027 \\ 
   &  &  &  &  & 40 & 0.025 & 0.025 & 0.025 \\ 
   &  &  &  &  & 60 & 0.025 & 0.025 & 0.024 \\ 
   &  &  &  &  & 80 & 0.025 & 0.025 & 0.024 \\ 
   &  &  &  &  & 100 & 0.025 & 0.025 & 0.024 \\ 
   \hline
  S3 & 0.1 & 0.8 & 0.1 & 80 & 20 & 0.024 & 0.025 & 0.026 \\ 
   & 0.3 &  &  &  &  & 0.025 & 0.025 & 0.027 \\ 
   & 0.4 &  &  &  &  & 0.025 & 0.025 & 0.027 \\ 
   & 0.6 &  &  &  &  & 0.025 & 0.025 & 0.027 \\ 
   & 0.8 &  &  &  &  & 0.025 & 0.025 & 0.027 \\ 
   & 0.9 &  &  &  &  & 0.024 & 0.025 & 0.026 \\ 
   \hline
  S4 & 0.6 & 0.8 & 0 & 20 & 20 & 0.025 & 0.026 & 0.028 \\ 
   &  &  &  & 40 &  & 0.025 & 0.025 & 0.029 \\ 
   &  &  &  & 60 &  & 0.025 & 0.025 & 0.029 \\ 
   &  &  &  & 80 &  & 0.025 & 0.025 & 0.029 \\ 
   &  &  &  & 100 &  & 0.025 & 0.024 & 0.028 \\ 
   &  &  &  & 120 &  & 0.025 & 0.025 & 0.028 \\ 
   \hline
\end{tabular}
\end{table}

% Table 4 for power with revised pn and pmax
\begin{table}[ht]
\renewcommand*{\arraystretch}{1.1}
\caption{Power with modified $P^F_n$, $P^F_{max}$, $P^I_n$, and $P^I_{max}$}
\label{T: power revised pn} 
\centering
\begin{tabular}{cccccccccc}
  \hline
Scenario & $\theta_c$ & $\Delta$ & Sn & Fn & $n^{(o)}$ & $n^{(u)}$ & MGD$^F$ & MGD$^I$ & GD \\
  \hline
S1 & 0.1 & 0 & 0.8 & 0.1 & 80 & 15 & 0.024 & 0.025 & 0.027 \\ 
   & 0.3 &  &  &  &  &  & 0.025 & 0.025 & 0.028 \\ 
   & 0.5 &  &  &  &  &  & 0.025 & 0.025 & 0.027 \\ 
   & 0.7 &  &  &  &  &  & 0.025 & 0.025 & 0.028 \\ 
   & 0.9 &  &  &  &  &  & 0.024 & 0.025 & 0.027 \\ 
   \\
  S1 & 0.3 & 0.143 & 0.8 & 0.1 & 80 & 15 & 0.811 & 0.788 & 0.804 \\ 
   &  & 0.17 &  &  &  &  & 0.919 & 0.885 & 0.910 \\ 
   &  & 0.188 &  &  &  &  & 0.958 & 0.922 & 0.950 \\ 
   & 0.7 & 0.127 &  &  &  &  & 0.819 & 0.810 & 0.811 \\ 
   &  & 0.145 &  &  &  &  & 0.913 & 0.895 & 0.903 \\ 
   &  & 0.16 &  &  &  &  & 0.959 & 0.937 & 0.949 \\
   \hline 
  S2 & 0.1 & 0 & 0.8 & 0.1 & 80 & 40 & 0.024 & 0.025 & 0.024 \\ 
   & 0.3 &  &  &  &  &  & 0.025 & 0.025 & 0.025 \\ 
   & 0.5 &  &  &  &  &  & 0.025 & 0.025 & 0.023 \\ 
   & 0.7 &  &  &  &  &  & 0.025 & 0.025 & 0.025 \\ 
   & 0.9 &  &  &  &  &  & 0.024 & 0.025 & 0.024 \\ 
   \\
  S2 & 0.4 & 0.15 & 0.8 & 0.1 & 80 & 40 & 0.822 & 0.810 & 0.807 \\ 
   &  & 0.175 &  &  &  &  & 0.919 & 0.905 & 0.907 \\ 
   &  & 0.195 &  &  &  &  & 0.962 & 0.949 & 0.953 \\ 
   & 0.6 & 0.14 &  &  &  &  & 0.813 & 0.801 & 0.805 \\ 
   &  & 0.16 &  &  &  &  & 0.907 & 0.892 & 0.898 \\ 
   &  & 0.18 &  &  &  &  & 0.960 & 0.947 & 0.953 \\ 
   \hline
  S3 & 0.1 & 0 & 0.8 & 0.1 & 80 & 80 & 0.024 & 0.025 & 0.022 \\ 
   & 0.3 &  &  &  &  &  & 0.025 & 0.025 & 0.022 \\ 
   & 0.5 &  &  &  &  &  & 0.025 & 0.025 & 0.021 \\ 
   & 0.7 &  &  &  &  &  & 0.025 & 0.025 & 0.023 \\ 
   & 0.9 &  &  &  &  &  & 0.025 & 0.025 & 0.022 \\
   \\ 
  S3 & 0.4 & 0.149 & 0.8 & 0.1 & 80 & 80 & 0.819 & 0.814 & 0.806 \\ 
   &  & 0.172 &  &  &  &  & 0.912 & 0.907 & 0.902 \\ 
   &  & 0.192 &  &  &  &  & 0.958 & 0.954 & 0.952 \\ 
   & 0.6 & 0.137 &  &  &  &  & 0.797 & 0.797 & 0.792 \\ 
   &  & 0.159 &  &  &  &  & 0.905 & 0.903 & 0.902 \\ 
   &  & 0.178 &  &  &  &  & 0.958 & 0.956 & 0.956 \\ 
   \hline
\end{tabular}
\end{table}

\subsection{Binary endpoint in a three-stage design}

In this section, we provide a small simulation study for binary endpoint in a three-stage design with two ISCs. We consider a design with no futility stopping ($F_n = 0$) and three varying $S_n$'s at $0.8$, $0.85$ and $0.9$. The number of subjects per group with observed response is $n_1^{(o)} = 100$ by the first ISC, and $n_2^{(o)} = 200$ by the second ISC. The number of subjects with unobserved response is $n_1^{(u)} = n_2^{(u)} = 40$. The maximum sample size per group is $n^{(m)} = 300$. The number of simulation iteration is $10^5$, and we use $10^3$ samples to evaluated $P_n$ and $P_{max}$ by Monte Carlo integration. Equal weights are utilized in the Inverse Normal combination function. 

As shown in Table \ref{T:power_three_stage}, our MGD accurately controls the type I error at the nominal level $\alpha = 0.025$ at the null scenarios when the treatment effect $\Delta = 0$. The critical value $c_g(\alpha)$ is adjusted to be $0.018$ for GD to control the error rate at $0.025$. In power evaluation, GD is slightly more powerful than MGD when $S_n = 80\%$, but becomes similar for $S_n = 90\%$. 

% Table for three stage
\begin{table}[ht]
\renewcommand*{\arraystretch}{1.1}
\caption{Type I error and Power in a three-stage design}
\label{T:power_three_stage} 
\centering
\begin{tabular}{ccccccc}
  \hline
Scenario & $\theta_c$ & $\Delta$ & Sn  & MGD$^F$ & MGD$^I$ & GD \\
  \hline
S1 & 0.2 & 0 & 0.8 & 0.025 & 0.025 & 0.025 \\ 
   & 0.4 &  &  & 0.025 & 0.025 & 0.024 \\ 
   & 0.6 &  &  & 0.024 & 0.025 & 0.024 \\ 
   & 0.8 &  &  & 0.025 & 0.025 & 0.025 \\ 
   & 0.6 & 0.1 &  & 0.640 & 0.653 & 0.667 \\ 
   &  & 0.15 &  & 0.933 & 0.921 & 0.941 \\
    \hline 
  S2 & 0.2 & 0 & 0.85 & 0.025 & 0.025 & 0.024 \\ 
   & 0.4 &  &  & 0.025 & 0.026 & 0.024 \\ 
   & 0.6 &  &  & 0.025 & 0.025 & 0.024 \\ 
   & 0.8 &  &  & 0.025 & 0.025 & 0.024 \\ 
   & 0.6 & 0.1 &  & 0.649 & 0.664 & 0.672 \\ 
   &  & 0.15 &  & 0.943 & 0.928 & 0.946 \\ 
    \hline
  S3 & 0.2 & 0 & 0.9 & 0.025 & 0.026 & 0.023 \\ 
   & 0.4 &  &  & 0.026 & 0.026 & 0.023 \\ 
   & 0.6 &  &  & 0.025 & 0.026 & 0.022 \\ 
   & 0.8 &  &  & 0.025 & 0.025 & 0.022 \\ 
   & 0.6 & 0.1 &  & 0.665 & 0.678 & 0.678 \\ 
   &  & 0.15 &  & 0.955 & 0.940 & 0.955 \\
   \hline
\end{tabular}
\end{table}

\subsection{Operating characteristics of MGD$^F$ in time-to-event endpoint}

The operating characteristics of MGD$^F$ in the time-to-event case study at Section 5 are at Table \ref{T_TTE_MGDF}. 

\begin{table}[ht]
\centering
\caption{Operating characteristics of MGD$^F$ in time-to-event endpoint}
\label{T_TTE_MGDF}
\begin{tabular}{ccccccc}
  \hline
  \\
Enrollment & Control &  Hazard & Early stopping & Early stopping & Type I error / & ASN \\ 
rate &  1-year &  ratio & for futility & and predicting & power&  \\ 
(per month) & survival &   &  & success  & &  \\ 
\\
  \hline
  \\
10 & 0.20 & 1.00 & 0.564 & 0.006 & 0.021 & 286 \\ 
   & 0.30 & 1.00 & 0.542 & 0.006 & 0.020 & 290 \\ 
   & 0.50 & 1.00 & 0.502 & 0.007 & 0.020 & 298 \\ 
   & 0.60 & 1.00 & 0.487 & 0.008 & 0.021 & 301 \\ 
   \\
   & 0.30 & 0.72 & 0.081 & 0.141 & 0.669 & 355 \\ 
   & 0.30 & 0.66 & 0.039 & 0.235 & 0.844 & 345 \\ 
   & 0.30 & 0.61 & 0.016 & 0.355 & 0.943 & 326 \\ 
   \\
   \hline
   \\
  5 & 0.20 & 1.00 & 0.624 & 0.006 & 0.024 & 274 \\ 
   & 0.30 & 1.00 & 0.610 & 0.006 & 0.023 & 277 \\ 
   & 0.50 & 1.00 & 0.597 & 0.006 & 0.023 & 279 \\ 
   & 0.60 & 1.00 & 0.587 & 0.006 & 0.024 & 281 \\ 
   \\
   & 0.30 & 0.74 & 0.097 & 0.160 & 0.632 & 348 \\ 
   & 0.30 & 0.68 & 0.045 & 0.277 & 0.824 & 336 \\ 
   & 0.30 & 0.63 & 0.017 & 0.422 & 0.936 & 312 \\ 
   \\
   \hline
\end{tabular}
\end{table}


\bibliographystyle{apalike}
\bibliography{./ref_supp}


\end{document}
